# Supplementary material
Source: MDPI journal article supplement (https://www.mdpi.com/2072-4292/9/4/388)
Supplement: s1 [file s1]

# A Glacier Surge of Bivachny Glacier, Pamir Mountains, Observed by a Time Series of High-Resolution Digital Elevation Models and Glacier Velocities

Anja Wendt, Christoph Mayer, Astrid Lambrecht and Dana Floricioiu

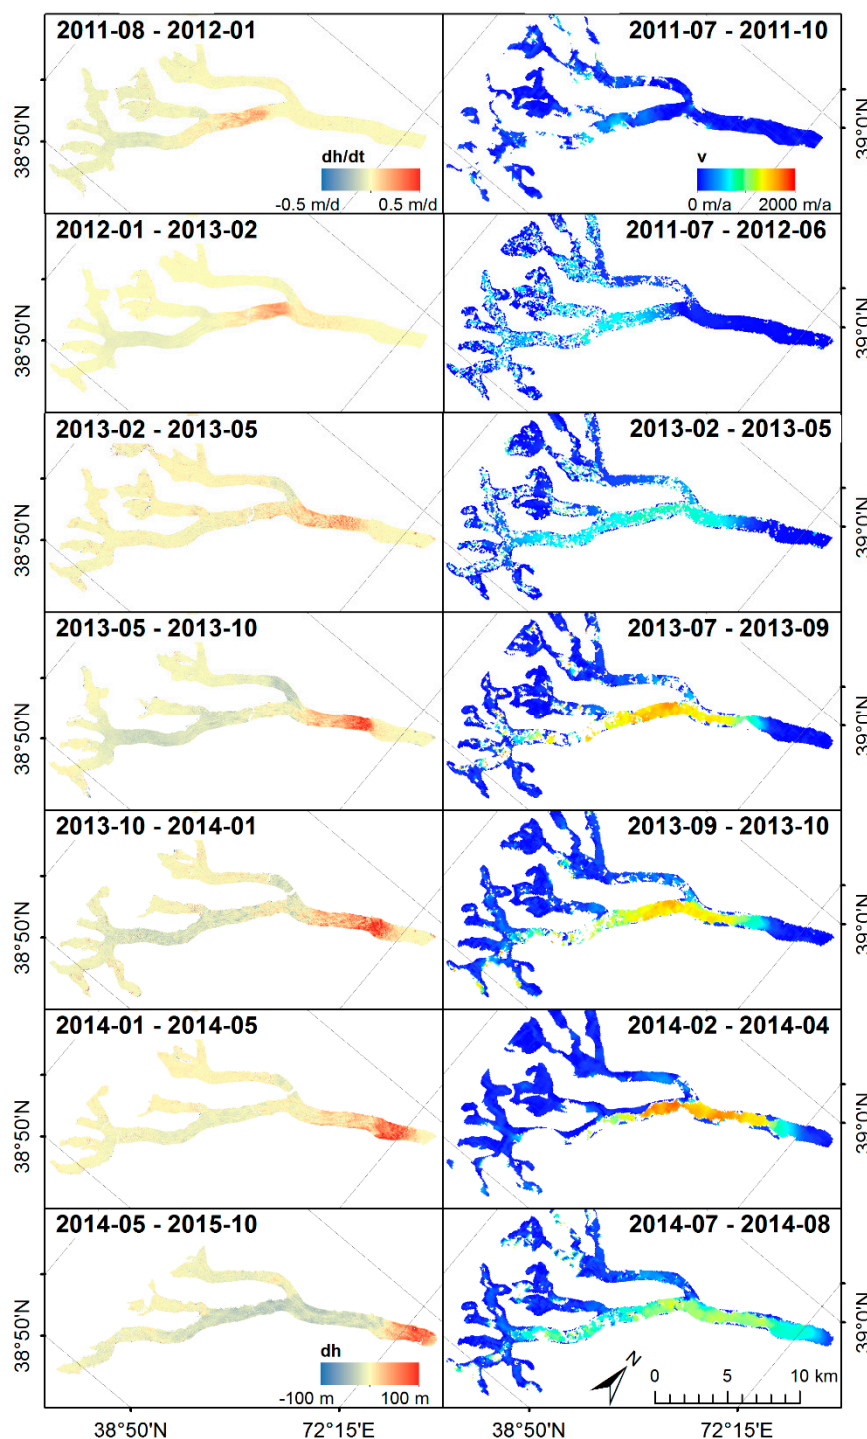

**Figure S1.** Maps of elevation change rate (or absolute elevation change for May 2014–October 2015) and velocities of Bivachny Glacier at discrete time steps.
